# Supplementary material for: Improving patient follow-up after inpatient stay
Source: PubMed Central journal article supplement — BMJ Qual Improv Rep. 2012 Oct 24;1(1):u474.w148. doi: 10.1136/bmjquality.u474.w148 (PMC4652674; doi:10.1136/bmjquality.u474.w148), 2012-10-24
Supplement: bmjqir.u474.w148-s1.pdf [file bmjqir.u474.w148-s1.pdf]

## Improving Patient Follow Up data

|                                                      | Pre (n=20) | Post (n=20) |
|------------------------------------------------------|------------|-------------|
| Mean length of stay                                  | 6.65       | 8.84        |
| Mean no. of Interventions                            | 1.5        | 2.2         |
| Patients with No follow up                           | 15.0%      | 5.0%        |
| Patients who RIP                                     | 0%         | 10%         |
| Patient transfers                                    | 0%         | 10%         |
|                                                      |            |             |
| Total No. Interventions                              | 32         | 41          |
| No. Interventions on Discharge Summary               | 30         | 41          |
| % Interventions on Discharge Summary                 | 93.8%      | 100.0%      |
|                                                      |            |             |
| No. Interventions requiring secondary care follow up | 22         | 33          |
| No. Interventions that occurred                      | 16         | 26          |
| % Interventions that occurred                        | 72.7%      | 78.8%       |
|                                                      |            |             |
| Total No. GP jobs                                    | 9          | 5           |
| No. GP blood tests                                   | 4          | 4           |
| No. GP bloods carried out                            | 3          | 4           |
| % GP bloods taken                                    | 75%        | 100%        |
|                                                      |            |             |
| Average time to follow up (days)                     | 26         | 24          |
| Average delay in follow up (days)                    | 8          | 6           |
|                                                      |            |             |
| No. Interventions with time limits stated            | 19         | 32          |
| No. Interventions carried out within time limit      | 12         | 12          |
| % of Interventions within time limit                 | 63.2%      | 37.5%       |

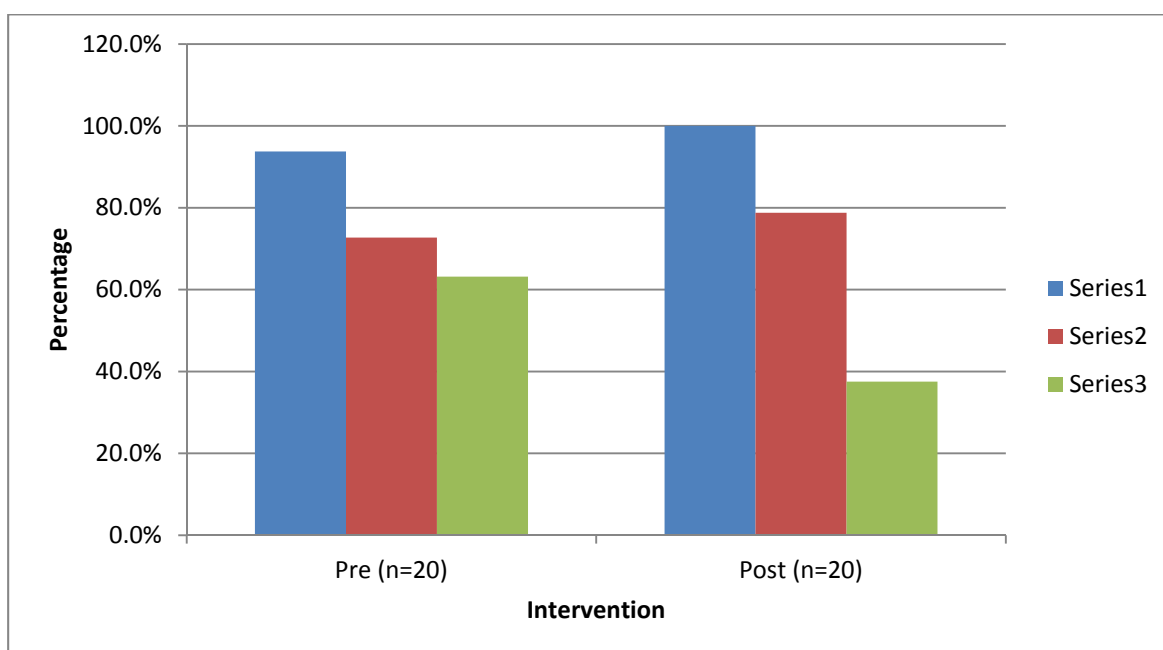

Series 1: Interventions on discharge summary

Series 2: Interventions that were carried out

Series 3: Interventions that were carried out within stated time limit on discharge summary
